# Supplementary material for: Regulation of Hippo/YAP signaling and Esophageal Squamous Carcinoma progression by an E3 ubiquitin ligase PARK2
Source: PubMed Central journal article supplement (PMC7449928; doi:10.7150/thno.46078), 2020-07-25
Supplement: thnov10p9443s1.pdf [file thnov10p9443s1.pdf]

## Supplementary Figure legends:

**Figure S1:** The STR profiling of our KYSE150 cells

**Figure S2:** The sequencing of PARK2 KO in EC9706 and KYSE150 cells.

**Figure S3:** The sequencing of YAP KO in EC9706 cells.

**Figure S4: A and B:** PARK2 knockout increased the wound-healing ability in EC9706 cells and KYSE150 cells compared with the wild type cells. **C:** Overexpression of PARK2 inhibited the wound-healing ability compared with control cells in EC9706 cells. **D:** Colony formation ability decreased in PARK2 overexpression cells compared with control cells in EC9706 cells.

**Figure S5: A:** PARK2 knockout did not increase YAP mRNA level in EC9706 cells. **B:** *In vitro* ubiquitination assay showed that PARK2 could not induce the poly-ubiquitination of YAP, while the FBXW7 was used as the positive control for YAP ubiquitination. **C:** YAP KO could reduce cell migration and invasion capacity in EC9706 cells, which effect could not be rescued by further PARK2 knockout. **D:** PARK2 knockout did not change the protein levels of other Hippo signaling components, including TAZ, LATS1/2, MST1/2 in EC9706 and KYSE150 cells. **E:** YAP K90R mutant was more stable compared with YAP WT form. **F:** PARK2 could facilitate YAP poly-ubiquitination in HEK293 cells.

**Table S1:** The primer sequences for Real-time PCR

**Table S2:** Small interfering RNA sequence for YAP and PINK1

**Table S3:** The guide RNA sequence for PARK2 and YAP knockout

# Supplementary Figure 1

KYSE150

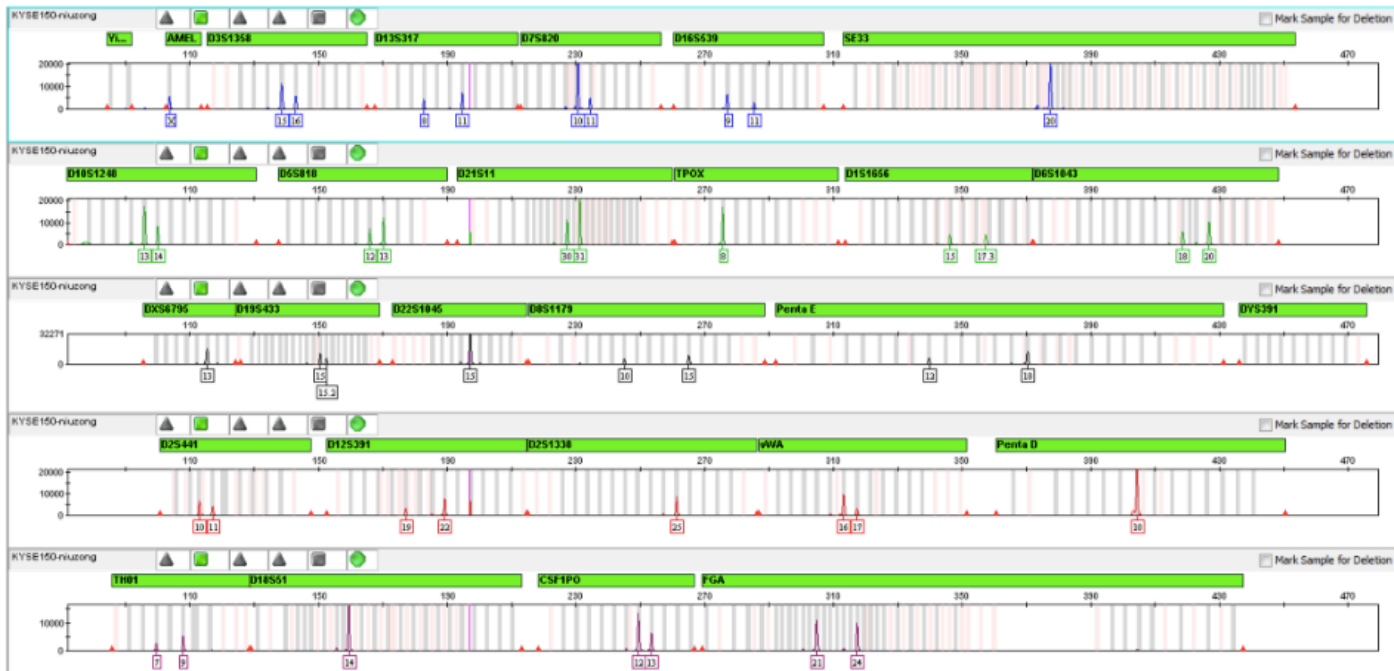

| EV          | Cell No. | Cell name         | Locus names |         |        |         |       |      |     |      |        |
|-------------|----------|-------------------|-------------|---------|--------|---------|-------|------|-----|------|--------|
|             |          |                   | D5S818      | D13S317 | D7S820 | D16S539 | VWA   | TH01 | AM  | TPOX | CSF1PO |
|             |          | Query (Your Cell) | 12,13       | 8,11    | 10,11  | 9,11    | 16,17 | 7,9  | X,X | 8,8  | 12,13  |
| 1.00(36/36) | 375      | KYSE-150          | 12,13       | 8,11    | 10,11  | 9,11    | 16,17 | 7,9  | X,X | 8,8  | 12,13  |

# Supplementary Figure 2

EC9706

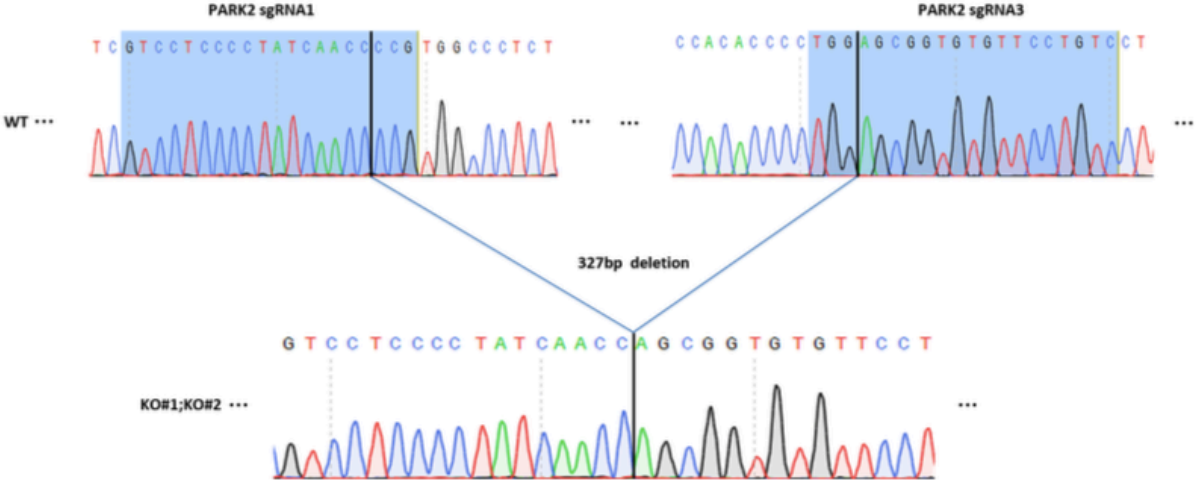

KYSE150

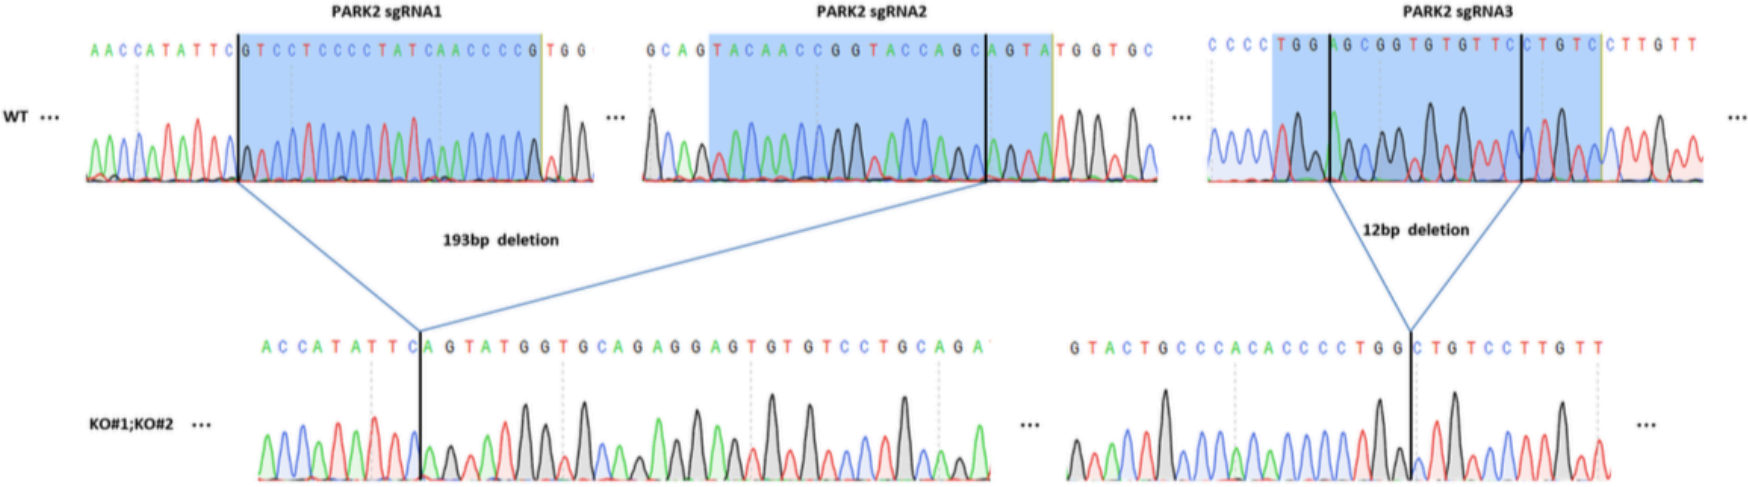

# Supplementary Figure 3

EC9706

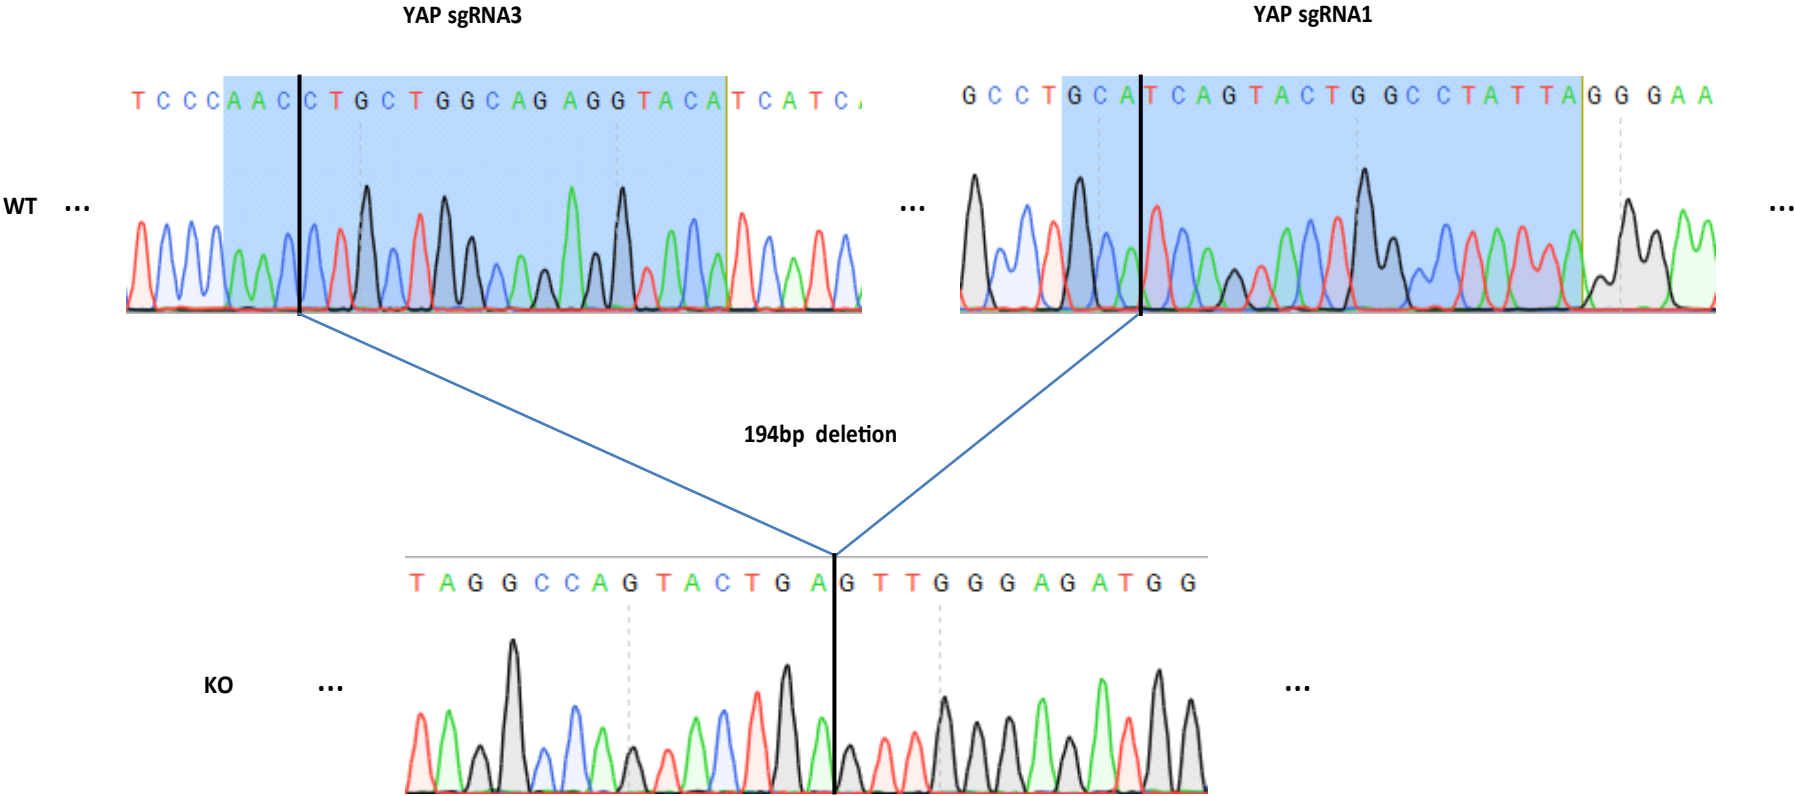

# Supplementary Figure 4

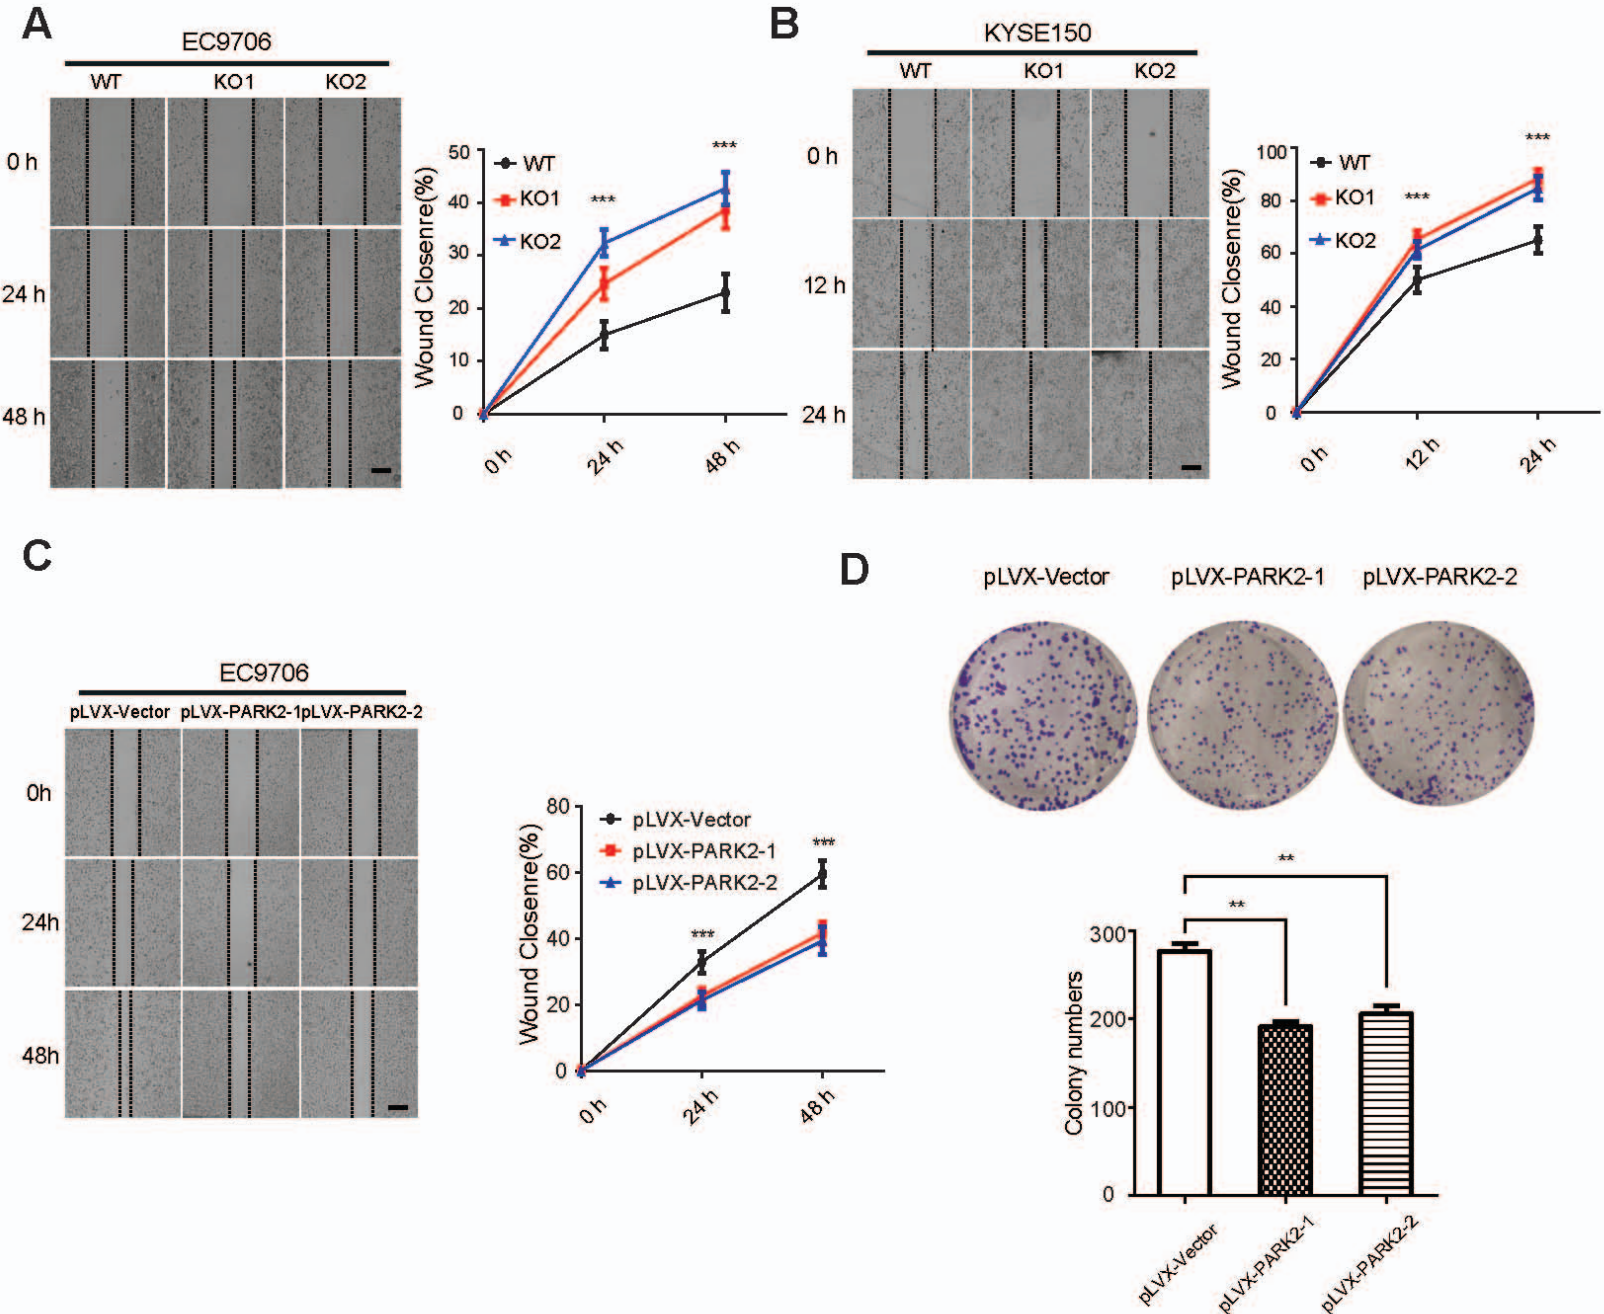

# Supplementary Figure 5

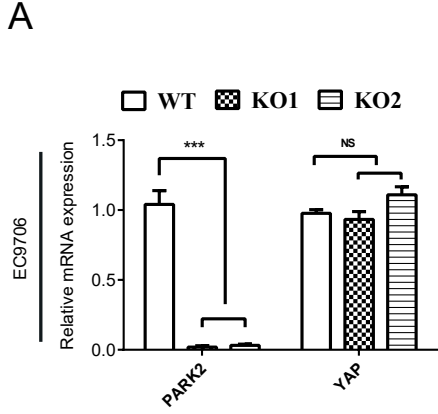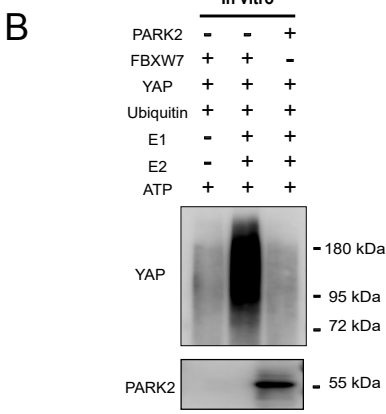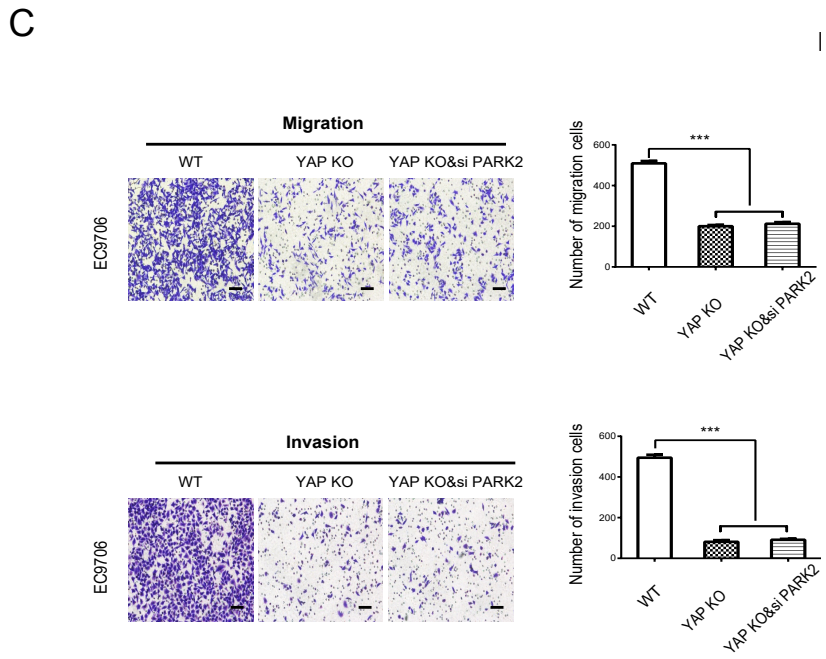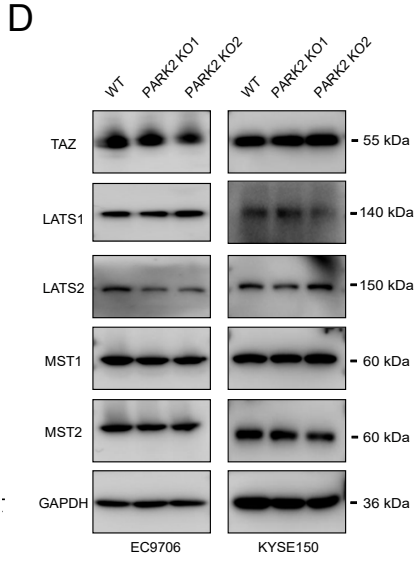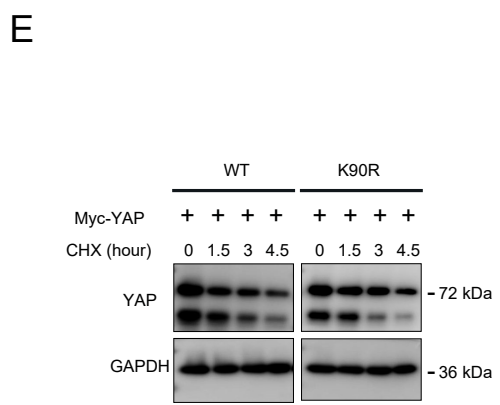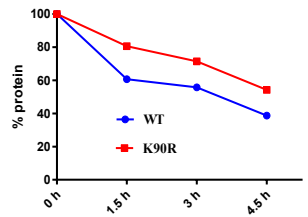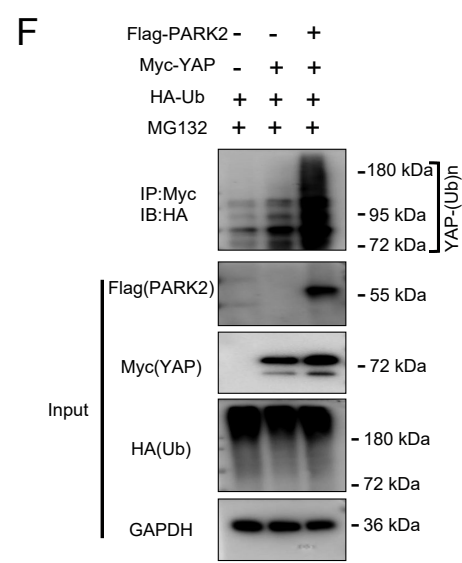

## Supplementary table 1

### Primer sequence for QPCR

---

| <b>Oligos</b> | <b>Sequence (5'-3') forward</b> | <b>Sequence (5'-3') reverse</b> |
|---------------|---------------------------------|---------------------------------|
| PARK2         | CACACCCACCTCTGACAAG             | CTAAGCAAATCACGTGGCGG            |
| PINK1         | CGAAGCCATCTTGAACACAA            | GTTGCTTGGGACCTCTCTTG            |
| ANKRD1        | AGAACTGTGCTGGGAAGACG            | GCCATGCCTTCAAATGCCA             |
| CTGF          | CTCGCGGCTTACCGACTG              | GGCTCTGCTTCTCTAGCCTG            |
| CYR61         | AGCAGCCTGAAAAAGGGCAA            | AGCCTGTAGAAGGGAAACGC            |
| GAPDH         | ACGGGAAGCTTGTCATCAAT            | TGGACTCCACGACGTACTION           |

---

## Supplementary table 2

### Small interfering RNA sequence for YAP and PINK1

---

| <b>Oligos</b>    | <b>Sequence (5'-3') forward</b> | <b>Sequence (5'-3') reverse</b> |
|------------------|---------------------------------|---------------------------------|
| si YAP-1         | CACCUAUCACUCUCGAGAUdTdT         | AUCUCGAGAGUGAUAGGUGdTdT         |
| si YAP-2         | GCUCAUUCUCUCCAGCUdTdT           | AAGCUGGAGAGGAAUGAGCdTdT         |
| si YAP-3         | CUAAGCAUGAGCAGCUACAdTdT         | UGUAGCUGCUCAUGCUUAGdTdT         |
| Negative control | UUCUCCGAACGUGUCACGUTT           | ACGUGACACGUUCGGAGAATT           |
| si PINK1-1       | CCUAUGAAAUCUUCGGGCUdTdT         | AGCCCGAACAUUUCAUAGGdTdT         |
| si PINK1-2       | CGCAAUGUGCUUCAUCUAdTdT          | UAGAUGAAGCACAUUUGCGdTdT         |
| Negative control | UUCUCCGAACGUGUCACGUTT           | ACGUGACACGUUCGGAGAATT           |

---



# Supplementary table 3

## The guide RNA sequence for PARK2 and YAP knockout

---

| <b>Oligos</b>  | <b>Sequence (5'-3') forward</b> | <b>Sequence (5'-3') reverse</b> |
|----------------|---------------------------------|---------------------------------|
| PARK2 sg RNA-1 | CACC GTCCTCCCCTATCAACCCCG       | AAAC CGGGGTTGATAGGGGAGGAC       |
| PARK2 sg RNA-2 | CACC G TACAACCGGTACCAGCAGTA     | AAAC TACTGCTGGTACCGGTTGTA C     |
| PARK2 sg RNA-3 | CACC GACAGGAACACACCGCTCCA       | AAAC TGGAGCGGTGTGTTCTGTC        |
| YAP sg RNA-1   | CACCGTAATAGGCCAGTACTGATGC       | AAACGCATCAGTACTGGCCTATTAC       |
| YAP sg RNA-2   | CACCGACCCCACTGGAGTAGTCTC        | AAACGAGACTACTCCAGTGGGGGTC       |
| YAP sg RNA-3   | CACCGTGTACCTCTGCCAGCAGGTT       | AAACAACCTGCTGGCAGAGGTACAC       |

---
